# Supplementary material
Source: MDPI journal article supplement (https://www.mdpi.com/2071-1050/14/5/3006)
Supplement: s1 [file s1]

## Supplementary Material

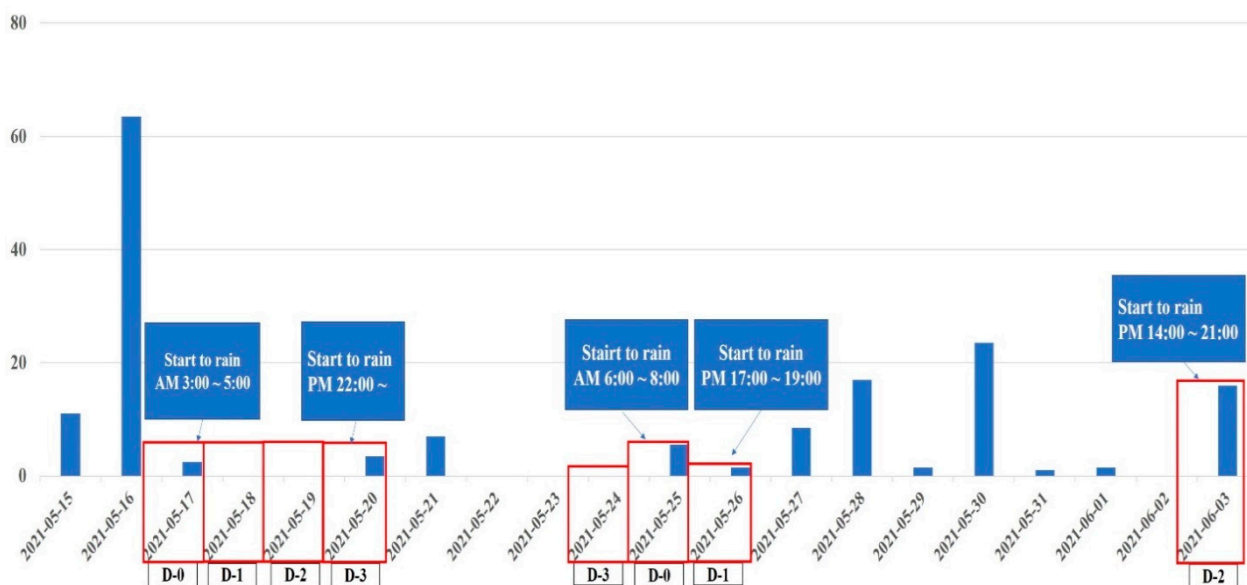

**Figure S1.** Sampling date and daily precipitation.

We started the experiment on 2021.05.17. and when sampling was performed, the situation was recorded.

2021.05.17 (D-0): It rained from 3:00 to 5:00. At 14:35 when sampling was carried out, the road was dry.

2021.05.18 (D-1): It didn't rain and nothing significant.

2021.05.19 (D-2): It didn't rain and nothing significant.

2021.05.20 (D-3): Road dust was sampled at 14:00, and rainfall occurred after sampling.

2021.05.22~23: Sampling was not carried out because a rainfall event was predicted.

2021.05.24 (D-3): After 2021.05.21., drying period is 3 days (2021.05.21. (D-0), 2021.05.22. (D-1), 2021.05.23. (D-2)).

2021.05.25 (D-0): It rained from 6:00 to 8:00. At 14:00 when sampling was carried out, the road was dry

2021.05.26 (D-1): Rainfall occurred after sampling.

2021.06.03 (D-2): Rainfall occurred after sampling.

Since the field test was conducted, it was difficult to keep the number of drying period in succession.

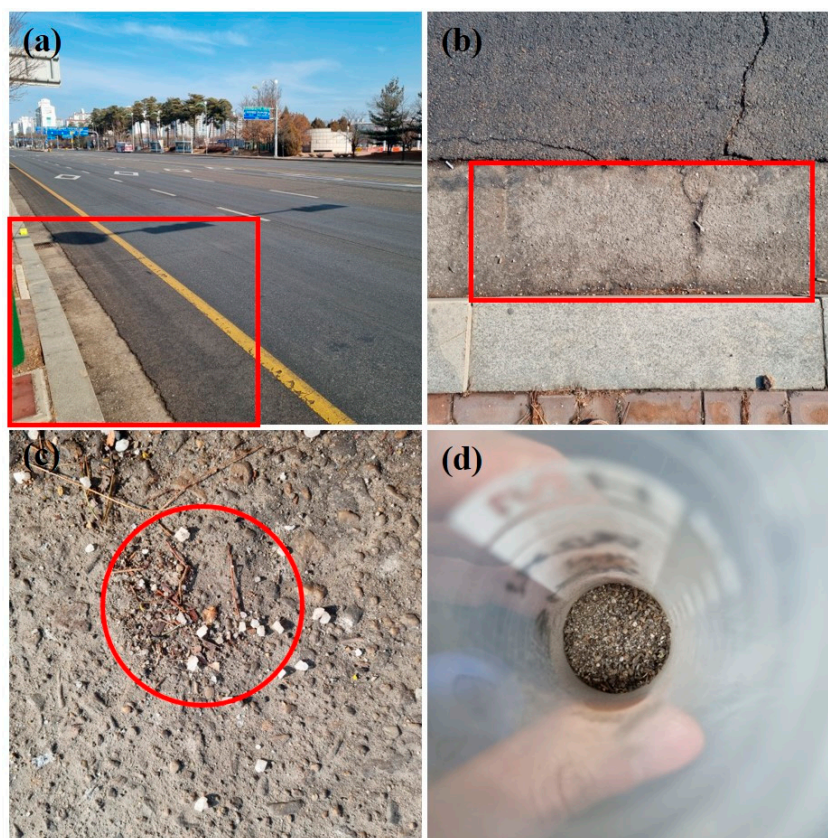

**Figure S2.** Sampling (a) site, (b) point, (c) road dust sample, (d) sampled road dust.

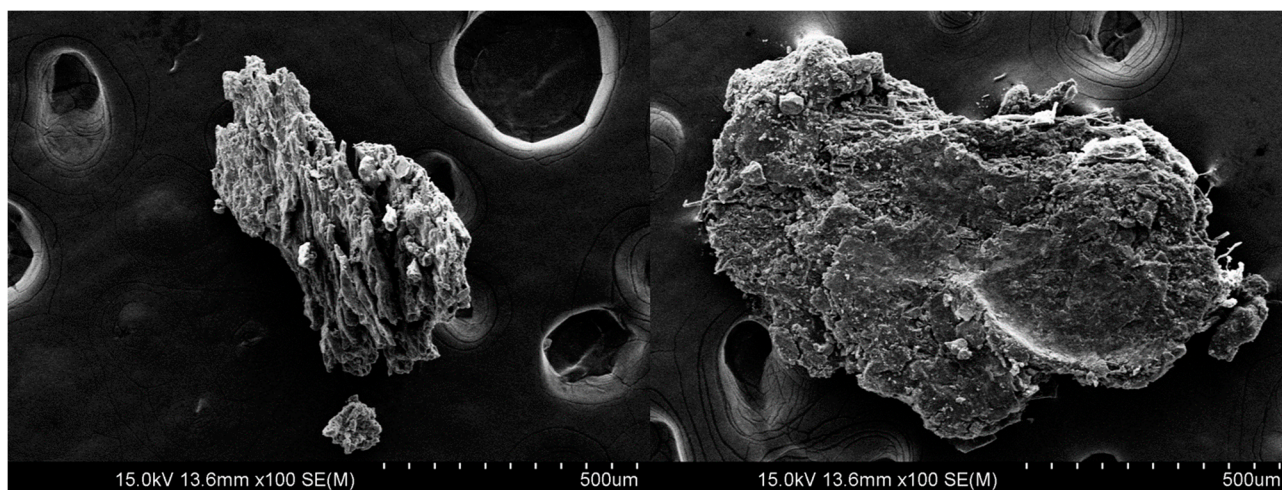

**Figure S3.** SEM image of black particles (x 100).

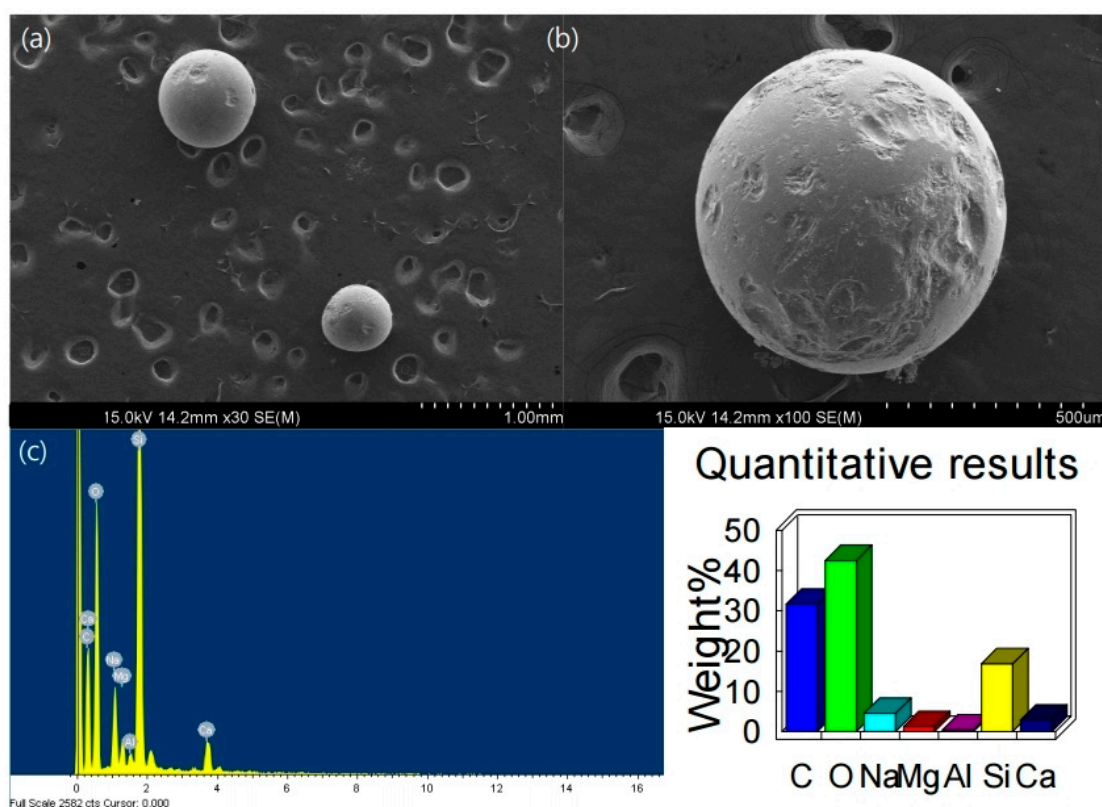

Figure S4. SEM image of glass beads (a) x 30, (b) 100 and (c) SEM-EDX analysis.

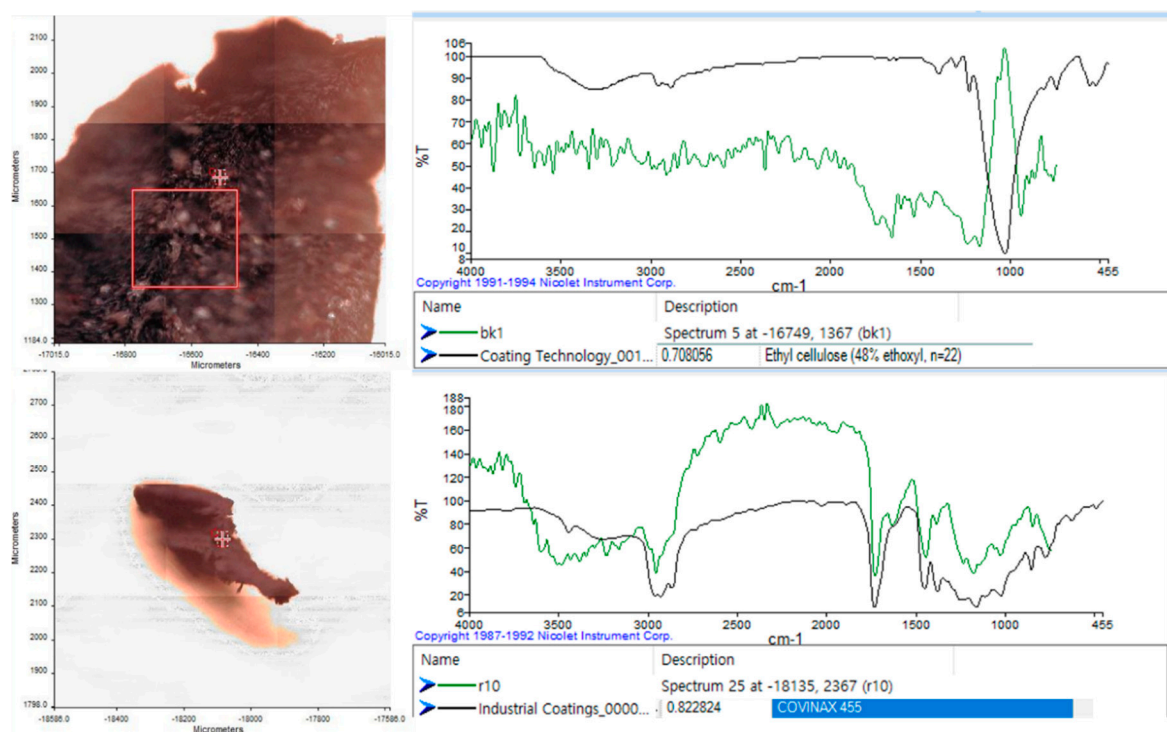

Figure S5. Coating material FT-IR analysis (Ethyl cellulose (matching score: 0.708), COVINAX (matching score: 0.822)).



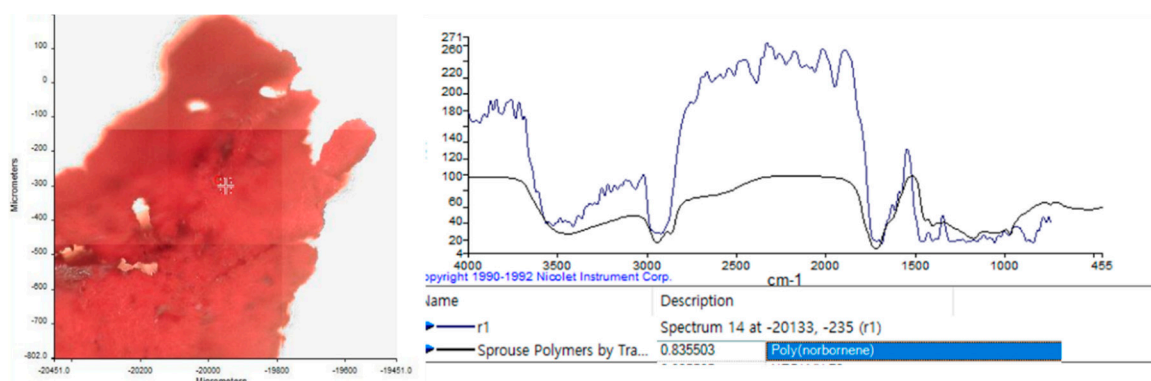

**Figure S6.** Rubber for anti-impact and vibration FT-IR analysis (Poly(norbornene) (matching score: 0.835)).

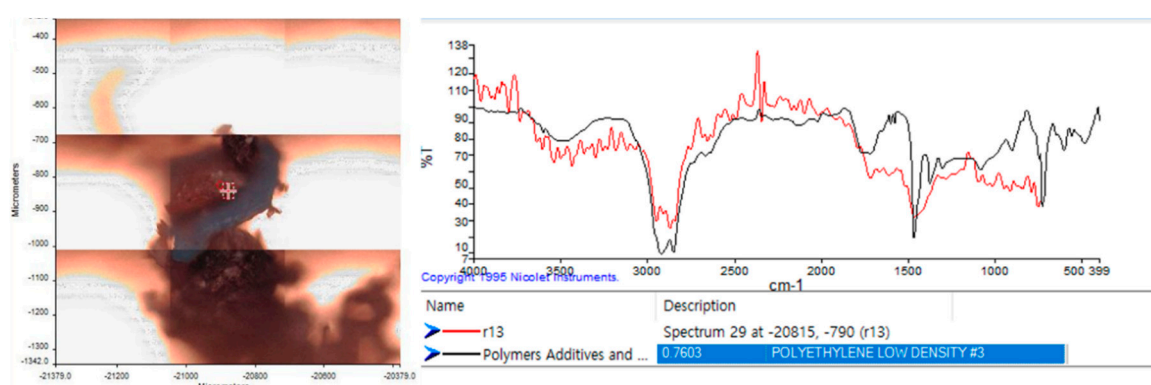

**Figure S7.** Polyethylene FT-IR analysis (Polyethylene (low density)) (matching score: 0.760)).

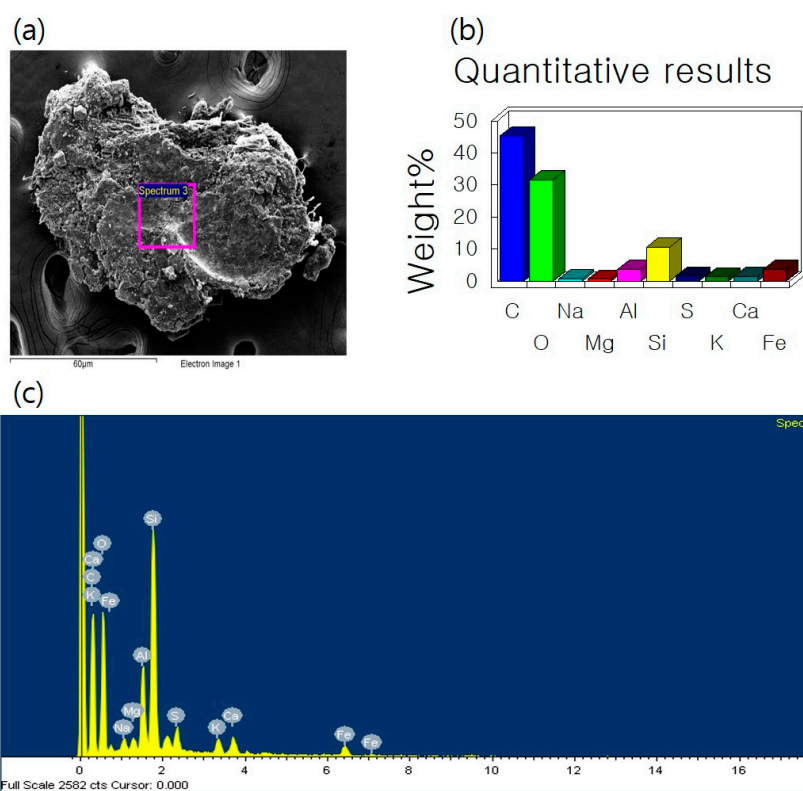

**Figure S8.** SEM-EDX analysis of tire from road dust.

**Table S1.** Tire chemical component [1].

| <b><i>Component</i></b>                                                           | <b><i>Mass%</i></b> |
|-----------------------------------------------------------------------------------|---------------------|
| <i>Nature rubber: polyisoprene(C<sub>5</sub>H<sub>8</sub>)</i>                    | <i>40 ~ 50</i>      |
| <i>Filler: Carbon black (C), silica(SiO<sub>2</sub>), chalk(CaCO<sub>3</sub>)</i> | <i>30 ~ 35</i>      |
| <i>Softener: (oil and resin)</i>                                                  | <i>15</i>           |
| <i>Vulcanization agents: Sulfur(S), Zinc oxidation(ZnO)</i>                       | <i>2 ~ 5</i>        |
| <i>Additives</i>                                                                  | <i>5 ~ 10</i>       |

## Reference

1. Sommer, F.; Dietze, V.; Baum, A.; Sauer, J.; Gilge, S.; Maschowski, C.; Gieré, R. Tire abrasion as a major source of microplastics in the environment. *Aerosol Air Qual. Res.* **2018**, *18*, 2014–2028.
